# Supplementary material for: The liver-specific microRNA miR-122 controls systemic iron homeostasis in mice
Source: JCI journal article supplement (doi:10.1172/jci44883), 2011-03-02
Supplement: sd1 [file 1]

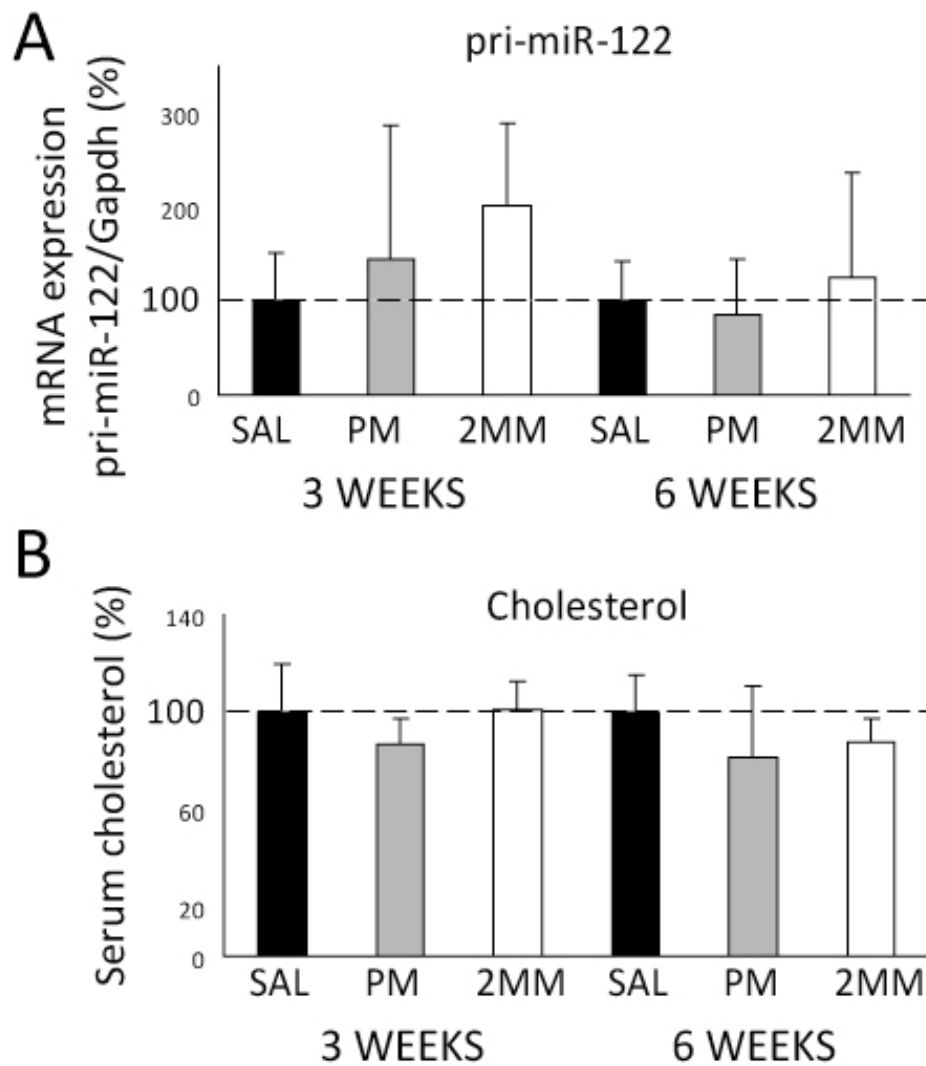

## Supplemental Figure 1

AntimiR-122 administration does not alter pri-miR-122 expression levels. **(A)** Analysis of pri-miR-122 expression three ( $p=0.205$ ) and six ( $p=0.611$ ) weeks after antimiR administration. Data were normalized to mRNA expression of a reference gene, *Gapdh*. Data are represented as mean  $\pm$  SD ( $n=8$ ), whereby data from the SAL-treated group were set to 100%. Total serum cholesterol is reduced in PM\_antimiR-122 mice. **(B)** Total serum cholesterol was analyzed as previously described (30) three ( $p=0.116$ ) and six ( $p=0.197$ ) weeks after antimiR administration. Data are represented as mean  $\pm$  SD ( $n=8$ ), whereby data from the SAL-treated group were set to 100%. Statistical significance was determined by using one-way ANOVA,  $*p < 0.05$ . SAL: Saline; PM: PM\_antimiR-122; 2MM: 2MM\_antimiR-122.

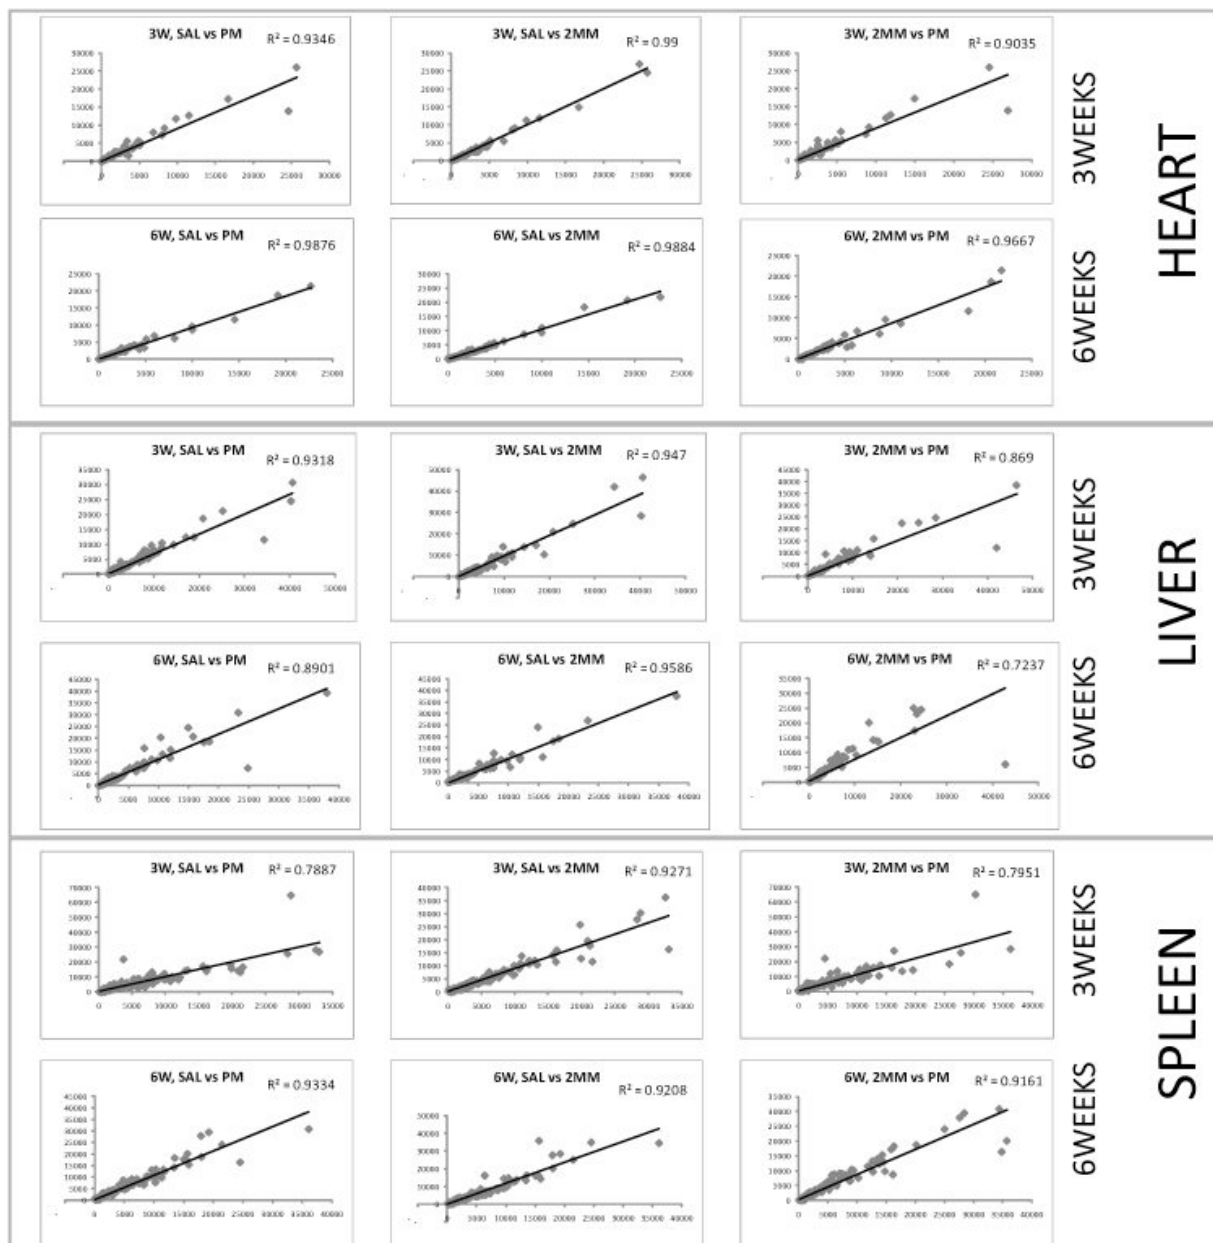

Supplemental Figure 2

AntimiR administration specifically and exclusively affects expression of miR-122 in the liver. Scatter plots indicating miRNA expression in the heart (**top panel**), in the liver (**middle panel**) or in the spleen (**lower panel**) of antimiR treated mice three and six weeks after antimiR administration. Tissue miRNAs were scored as significantly changed when altered more than two-fold in PM\_antimiR-122 mice compared to the controls [saline (SAL) and 2MM\_antimiR-122 (2MM)]. The linear relationship between the X and Y variables (i.e. samples) was calculated by using the correlation coefficient  $R^2$  (An  $R^2$  of 1.0 indicates that the regression line perfectly fits the data).

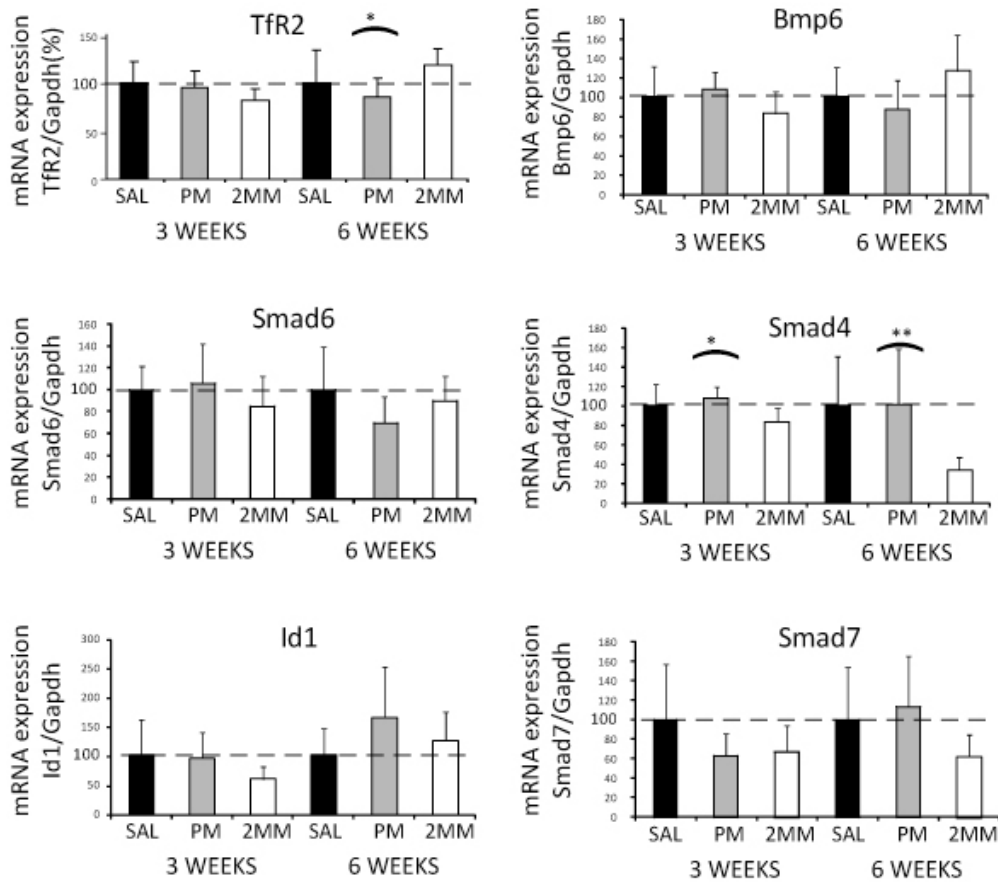

### Supplemental Figure 3

mRNA expression of genes involved in hepcidin activation or suppression in PM\_anti-miR-122 mice. Analysis of hepatic mRNA expression of transferrin receptor 2 (Tfr2;  $p=0.0467$  at six weeks time point), Smad family member 6 (Smad6), Bone morphogenetic protein 6 (Bmp6), Smad family member 4 (Smad4;  $p=0.024$  and  $p=0.0087$  at three and six weeks respectively), inhibitor of DNA binding 1 (Id-1) and Smad family member 7 (Smad7) was analyzed by qPCR three and six weeks after anti-miR administration. Data were normalized to mRNA expression of a reference gene, Gapdh. Data are represented as mean  $\pm$  SD ( $n=8$ ), whereby data from the SAL-treated group were set to 100%. SAL: Saline; PM: PM\_anti-miR-122; 2MM: 2MM\_anti-miR-122. %. Statistical significance was determined by using one-way ANOVA, \* $p < 0.05$ , \*\* $p < 0.01$ .

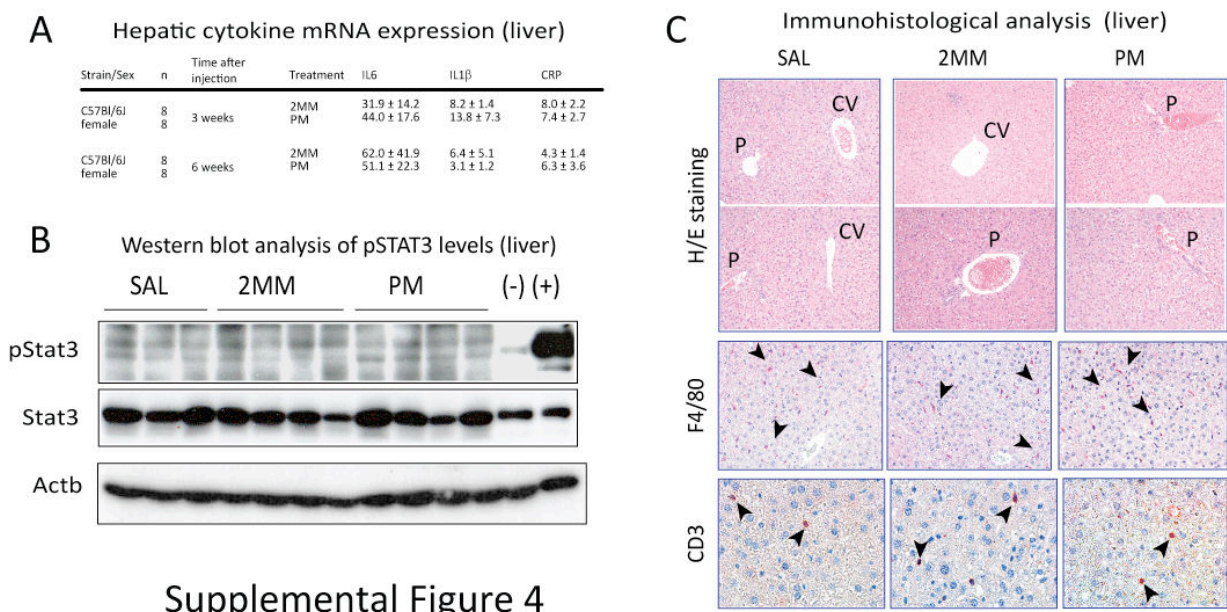

Supplemental Figure 4

(A) Cytokine mRNA expression in response to hepatic miR-122 inhibition. mRNA expression of the cytokines IL6 (Interleukin 6) and IL1 $\beta$  (Interleukin 1 $\beta$ ) and of the target gene CRP (C-reactive protein), was analyzed by qPCR of liver total RNA from C57BL/6J mice three and six weeks after PM\_anti-miR-122 or 2MM\_anti-miR-122 administration. The number of mice analyzed is indicated. For qPCR data normalization Gapdh, Actin B and Tubulin A were used. Data are shown as mean  $\pm$  SD. PM: PM\_anti-miR-122; 2MM: 2MM\_anti-miR-122; (+) positive control; (-) negative control. (B) Western Blot analysis of pStat3 and total Stat. Phospho Stat3 (pStat3) and total Stat3 (Stat3) was assessed by western blot analysis in the liver of mice three weeks after PM\_anti-miR-122 injection. ActinB (Actb) is shown as loading control. As a positive control (+) primary hepatocytes were treated with 5 ng of IL6 for 30 minutes. As a negative control (-) primary hepatocytes were treated with the vehicle solution. Immunohistological analysis of liver morphology. (C) To investigate whether anti-miR-122 administration induces morphological lesions we performed histochemical stains (hematoxylin-eosin, E/H) on liver sections using conventional microscopy (3 $\mu$ m). Hepatic morphology was similar in the two control groups and in the PM\_anti-miR-122-injected mice. P indicates, the Portal vein, CV the Central vein. To exclude that anti-miR-122 administration results in the invasion of immune cells into the liver we performed conventional microscopy analysis of immunohistological stains. We did not identify any significant difference in the number of cells positive for macrophage/Kupfer cell markers (F4/80, arrowheads) or in the number of cells positive for T-cell markers (CD3, arrowheads). All samples were analyzed three weeks after PM\_miR-122 injection. SAL: Saline; PM: PM\_anti-miR-122; 2MM: 2MM\_anti-miR-122. [The immunohistological method is described in detail in Wang S et al. Dis Model Mech. 3(1-2):92-103, 2010.

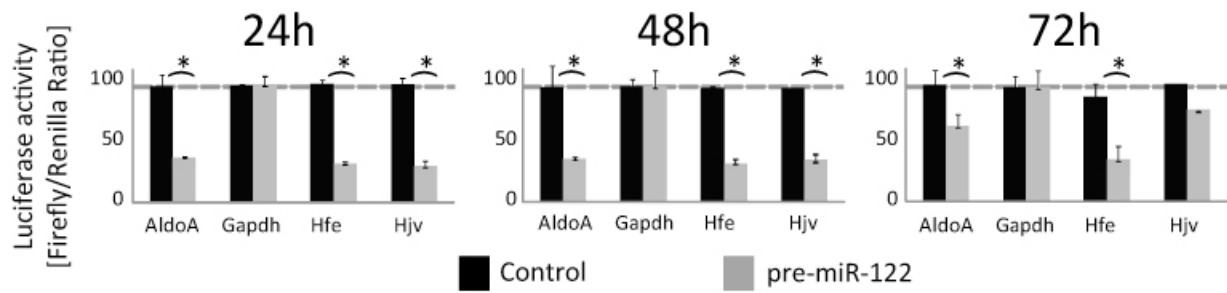

## Supplemental Figure 5

Analysis of sequences predicted to bind miR-122 within the Hfe or Hemojuvelin 3'-UTRs. Hepa1-6 cells were cotransfected with luciferase reporter vectors (pMIR) linked to the 3'-UTRs of the murine Aldolase A (pMIR-mAldoA, AldoA), mGapdh (pMIR-mGapdh; Gapdh), Hfe (pMIR-mHfe, Hfe) or Hemojuvelin (pMIR-mHjv, Hjv) genes and a miR-122 mimic. Luciferase activity was measured 24, 48 and 72 hours later. The luciferase reporter assays are presented as normalized firefly luciferase counts  $\pm$  SD of the pre-miR-122 and control cells. Experiments were performed at least in triplicate and results of the luciferase reporter assay are presented as fold change  $\pm$  SD of the pre-miR-122 and control transfected cells. Statistical significance was determined using two tailed Student's t-test, \* $p < 0.05$

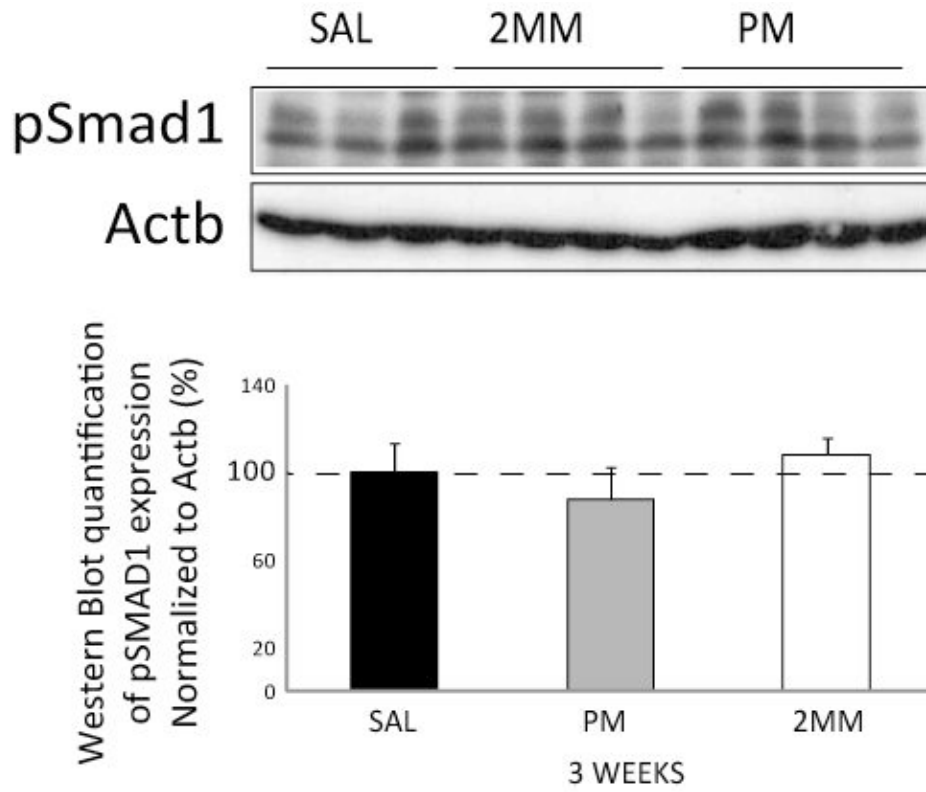

## Supplemental Figure 6

Phosphorylation of Smad1 (pSmad1) was assessed by western blot analysis in the liver of mice three weeks after PM\_antimiR-122 injection. ActinB (Actb) is shown as loading control. SAL: Saline; PM: PM\_antimiR-122; 2MM: 2MM\_antimiR-122.

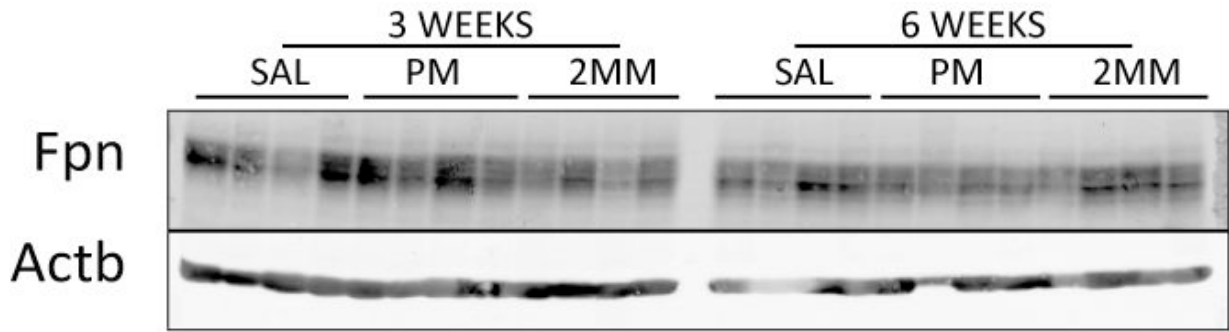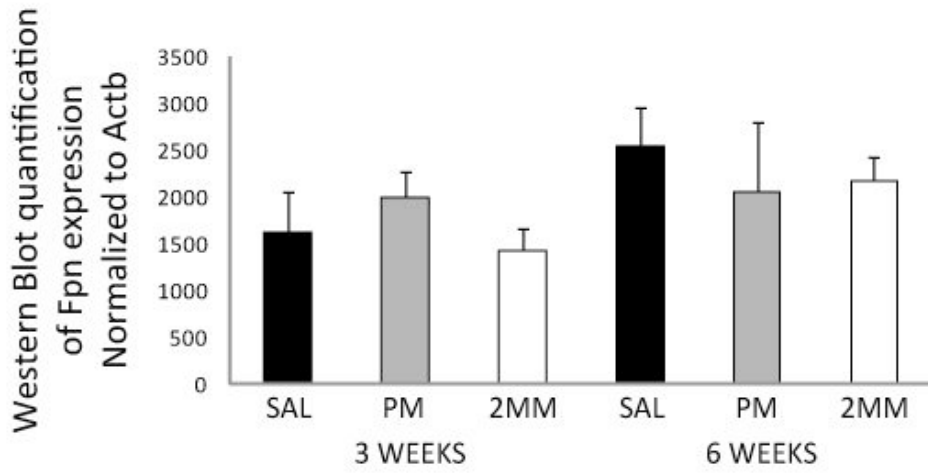

## Supplemental Figure 7

Ferroportin (Fpn) protein expression was assessed by western blot analysis in the spleen of mice three and six weeks after PM\_antimiR-122 administration. ActinB (Actb) is shown as loading control. SAL: Saline; PM: PM\_antimiR-122; 2MM: 2MM\_antimiR-122.

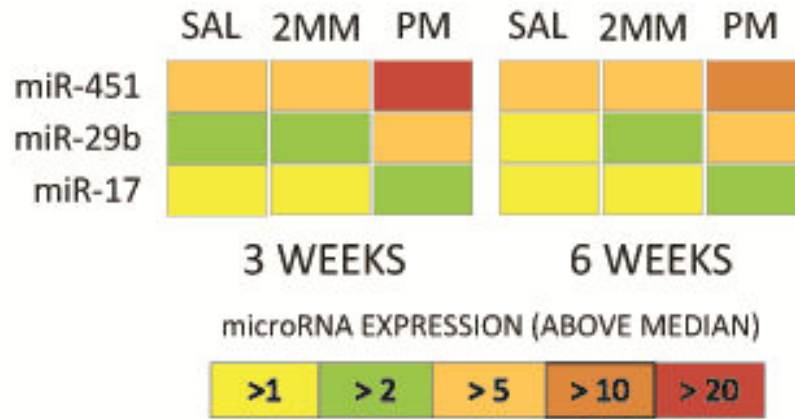

## Supplemental Figure 8

miRNAs with altered expression levels in the spleen of PM\_antimiR-122 treated mice. Heat map of differentially regulated miRNAs in spleens of PM\_antimiR-122 (PM) and control [saline (SAL) and 2MM\_antimiR-122 (2MM)] mice. MiRNA expression profiles were determined three and six weeks after anti-miR administration and differentially regulated miRNAs were identified by applying Serial Microarray Analysis (SAM). Expression levels are indicated by colors. miRNAs with decreased expression in PM\_antimiR-122 were not detected.



Supplemental Table 1, Haematological parameters

| Strain/Sex      | n | Time after injections | Treatment | MCV (fl)      | MCH (pg)   | Reticulocytes (%) | Rhb (pg)    |
|-----------------|---|-----------------------|-----------|---------------|------------|-------------------|-------------|
| C57Bl/6J female | 8 | 3 weeks               | SAL       | 46.9 ± 0.8    | 15.5 ± 0.5 | 3.9 ± 1.3         | 14.7 ± 0.4  |
|                 | 8 |                       | PM        | 45.5 ± 1.6    | 15.4 ± 0.9 | 6.8 ± 2.4         | 14.2 ± 0.3  |
|                 | 8 |                       | 2MM       | 46.7 ± 1.7    | 16.1 ± 0.3 | 4.4 ± 1.8         | 14.4 ± 0.2  |
| C57Bl/6J female | 8 | 6 weeks               | SAL       | 47.9 ± 1.0    | 15.9 ± 0.6 | 5.9 ± 3.4         | 15.4 ± 0.6  |
|                 | 8 |                       | PM        | 45.6 ± 1.5    | 15.0 ± 0.9 | 9.9 ± 6.4         | 15.0 ± 0.7  |
|                 | 8 |                       | 2MM       | 47.0 ± 2.0    | 15.6 ± 0.9 | 5.1 ± 2.4         | 15.0 ± 0.6  |
| Strain/Sex      | n | Time after injections | Treatment | WBC (/nl)     | RBC (/pl)  | HGB (g/dl)        | HCT (l/l)   |
| C57Bl/6J female | 8 | 3 weeks               | SAL       | 278.3 ± 83    | 6.83 ± 0.5 | 10.49 ± 0.8       | 0.32 ± 0.03 |
|                 | 8 |                       | PM        | 355.5 ± 94.7  | 6.86 ± 0.4 | 10.45 ± 0.7       | 0.31 ± 0.02 |
|                 | 8 |                       | 2MM       | 354.2 ± 59.4  | 6.65 ± 0.8 | 10.58 ± 1.4       | 0.31 ± 0.05 |
| C57Bl/6J female | 8 | 6 weeks               | SAL       | 295.4 ± 96.2  | 6.85 ± 0.4 | 10.84 ± 0.6       | 0.33 ± 0.02 |
|                 | 8 |                       | PM        | 252.8 ± 156.8 | 6.88 ± 0.4 | 10.36 ± 0.7       | 0.31 ± 0.02 |
|                 | 8 |                       | 2MM       | 353.5 ± 112.6 | 6.86 ± 0.3 | 10.75 ± 0.8       | 0.32 ± 0.02 |
| Strain/Sex      | n | Time after injections | Treatment | MCHC (g/dl)   | RDW (%)    | TRB (/nl)         |             |
| C57Bl/6J female | 8 | 3 weeks               | SAL       | 33.1 ± 0.8    | 12.4 ± 0.3 | 601 ± 239         |             |
|                 | 8 |                       | PM        | 33.5 ± 2.3    | 12.6 ± 0.9 | 434 ± 185         |             |
|                 | 8 |                       | 2MM       | 34.1 ± 2.0    | 12.6 ± 0.7 | 486 ± 174         |             |
| C57Bl/6J female | 8 | 6 weeks               | SAL       | 33.0 ± 1.4    | 12.7 ± 0.3 | 410 ± 152         |             |
|                 | 8 |                       | PM        | 33.5 ± 3.2    | 13.1 ± 0.7 | 399 ± 192         |             |
|                 | 8 |                       | 2MM       | 33.4 ± 2.4    | 12.8 ± 0.6 | 434 ± 178         |             |
| Strain/Sex      | n | Time after injections | Treatment | UIBC          | TIBC       | Tf (%)            |             |
| C57Bl/6J female | 8 | 3 weeks               | SAL       | 132.2 ± 27    | 454.5 ± 84 | 70.7 ± 6          |             |
|                 | 8 |                       | PM        | 139.2 ± 26    | 416.1 ± 29 | 66.7 ± 5          |             |
|                 | 8 |                       | 2MM       | 142.0 ± 14    | 480.7 ± 46 | 70.3 ± 4          |             |
| C57Bl/6J female | 8 | 6 weeks               | SAL       | 131.0 ± 22    | 390.7 ± 83 | 65.8 ± 6          |             |
|                 | 8 |                       | PM        | 137.6 ± 27    | 504.5 ± 58 | 72.6 ± 5          |             |
|                 | 8 |                       | 2MM       | 119.7 ± 20    | 381.1 ± 56 | 68.3 ± 5          |             |

Complete list of hematological parameters analyzed in anti-miR-injected mice. MCV, Mean Corpuscular Volume; MCH, Mean corpuscular hemoglobin; RhB, Hemoglobin content of reticulocytes; WBC, White Blood Cells; RBC, Red Blood Cells; HGB, Hemoglobin; HCT, Hematocrit; MCHC, Mean Corpuscular Hemoglobin Concentration; RDW, Red Blood Cell Distribution Width; TRB, Thrombocytes; UIBC, unsaturated iron-binding capacity; TIBC, Total iron binding capacity; Tf, Total Iron Transferrin. Number of mice (n) is indicated. Data are shown as mean ± SD. Statistical significance was determined by using one-way ANOVA, \*p < 0.05; \*\*p < 0.01. SAL: Saline; PM: PM\_anti-miR-122; 2MM: 2MM\_anti-miR-122.

Supplemental Table 2A, Haematological parameters &amp; liver iron measurements

| Strain/Sex      | n | Time after injections | Treatment | MCV (fl)       | MCH (pg)       | Reticulocytes (%) | Liver Iron ( $\mu\text{g/g}$ ) |
|-----------------|---|-----------------------|-----------|----------------|----------------|-------------------|--------------------------------|
| C57Bl/6J female | 5 | 1 week                | SAL       | 45.4 $\pm$ 0.9 | 14.9 $\pm$ 0.5 | 4.7 $\pm$ 1.2     | 306.6 $\pm$ 103.2              |
|                 | 5 |                       | PM        | 45.2 $\pm$ 0.4 | 15.8 $\pm$ 0.2 | 4.3 $\pm$ 0.6     | 291.9 $\pm$ 105.5              |
|                 | 5 |                       | 2MM       | 45.6 $\pm$ 0.6 | 15.3 $\pm$ 0.3 | 4.8 $\pm$ 0.5     | 366.6 $\pm$ 91.7               |
| C57Bl/6J female | 5 | 2 weeks               | SAL       | 45.8 $\pm$ 1.3 | 15.8 $\pm$ 0.3 | 4.5 $\pm$ 0.3     | 279.4 $\pm$ 21.2               |
|                 | 5 |                       | PM        | 44.8 $\pm$ 0.5 | 15.3 $\pm$ 0.2 | 5.4 $\pm$ 0.5     | 330.6 $\pm$ 48.3               |
|                 | 5 |                       | 2MM       | 45.4 $\pm$ 1.2 | 15.7 $\pm$ 0.2 | 4.6 $\pm$ 0.7     | 343.1 $\pm$ 42.4               |
| C57Bl/6J female | 5 | 3 weeks               | SAL       | 45.8 $\pm$ 0.5 | 15.5 $\pm$ 0.3 | 4.3 $\pm$ 0.4     | 383.2 $\pm$ 91.2               |
|                 | 5 |                       | PM        | 43.8 $\pm$ 0.8 | 14.8 $\pm$ 0.4 | 5.0 $\pm$ 0.3     | 225.6 $\pm$ 57.4               |
|                 | 5 |                       | 2MM       | 45.4 $\pm$ 0.6 | 15.5 $\pm$ 0.2 | 4.5 $\pm$ 0.4     | 371.8 $\pm$ 93.7               |

Supplemental Table 2B, tissue iron measurements

| Strain/Sex  | n | Time after injections | Treatment | Liver Iron ( $\mu\text{g/g}$ ) | Plasma Iron ( $\mu\text{g/dL}$ ) |
|-------------|---|-----------------------|-----------|--------------------------------|----------------------------------|
| NMRI female | 7 | 1 week                | SAL       | 410.2 $\pm$ 76.3               | 457.4 $\pm$ 85.3                 |
|             | 7 |                       | PM        | 367.8 $\pm$ 44.5               | 939.6 $\pm$ 58.2                 |
| NMRI female | 7 | 2 weeks               | SAL       | 405.9 $\pm$ 74.5               | 491.4 $\pm$ 174.6                |
|             | 7 |                       | PM        | 389.4 $\pm$ 80.6               | 345.7 $\pm$ 46.2                 |
| NMRI female | 7 | 3 weeks               | SAL       | 461.1 $\pm$ 117.3              | 426.0 $\pm$ 93.9                 |
|             | 7 |                       | PM        | 327.0 $\pm$ 91.3               | 306.6 $\pm$ 50.1                 |

Data from two additional, independent miR-122 in vivo inhibition experiments applying either altered experimental protocols and/or mice with different genetic background. **(A)** Hematological parameters (MCV, Mean Corpuscular Volume; MCH, Mean corpuscular hemoglobin) and hepatic iron levels of anti-miR injected mice. C57/BL6 WT-mice were injected into the tail-vein with anti-miR (25  $\mu\text{g/g/day}$ ) for three consecutive days and sacrificed one, two and three weeks after the final injection. **(B)** Liver ( $\mu\text{g}$  iron/g dry tissue) and plasma iron content ( $\mu\text{g}$  iron/dl) were determined in NMRI wild-type mice one, two and three weeks after injection of anti-miR (25  $\mu\text{g/g/day}$ ) into the tail-vein for three consecutive days. Number of mice (n) is indicated. Data are shown as mean  $\pm$  SD. Statistical significance was determined by using one-way ANOVA (Table 2A) or two tailed Student's t-test (Table 2B), \* $p < 0.05$ ; \*\* $p < 0.01$ . SAL: Saline; PM: PM\_antimiR-122; 2MM: 2MM\_antimiR-122.

| Gene Name | Predicted Target Site 1                                                                                                                     | Predicted Target Site 2                                                                                                                   | Predicted Target Site 3                                                                                                          |
|-----------|---------------------------------------------------------------------------------------------------------------------------------------------|-------------------------------------------------------------------------------------------------------------------------------------------|----------------------------------------------------------------------------------------------------------------------------------|
| Hjv       | <p>position 104-125bp</p> <p>5' ...CGGGGACAGGAGACA-<b>ACACTT</b>-<b>A</b>...<br/>                <br/> 3' G--TTTGTGGTAACAGTGTGAGGT</p>      | <p>position 274-295bp</p> <p>5' ...CATACACCTGATAC-CACT<b>CC</b>TA...<br/>                   <br/> 3' GTTTGTGGTAACAGTGTGAGG-T</p>          | <p>position 492-513bp</p> <p>5' ...CGGGCATTCCATC-CCTT<b>CC</b>TA...<br/>                    <br/> 3' GTTTGTGGTAACAGTGTGAGG-T</p> |
| Hfe       | <p>position 53-75bp</p> <p>5' ...GGGGCACACTTGCCTC-CA<b>CT</b>GTGA...<br/>                     <br/> 3' GTTTGTGGTAAC-AGTGTGAGGT</p>          | <p>position 249-270bp</p> <p>5' ...GAAGCATCCTATGTTTC-C<b>TTCA</b>...<br/>                            <br/> 3' GTTTGTGGTA-ACAGTGTGAGGT</p> |                                                                                                                                  |
| Hamp      | <p>position 83-104bp</p> <p>5' ...TCAACCCCATTTATT-TATT<b>CC</b>TG...<br/>                              <br/> 3' GTTTGTGGTAACAGTGTGAGG-T</p> | <h2>Supplemental Table 3</h2>                                                                                                             |                                                                                                                                  |
| AldoA     | <p>position 29-35bp</p> <p>5' ...AAGGCTGCTCCATCA--ACACT<b>CC</b>A...<br/>                            <br/> 3' GTTTGTGGTAACAGTGTGAGGT</p>    |                                                                                                                                           |                                                                                                                                  |

Putative miR-122 binding sites in the murine Hfe, hemojuvelin and hepcidin -3'-UTRs were identified by computational analysis applying MirTar, (47) or by a manual approach [RNA22; (48)]. The homology to the 3'-UTR of the target gene is indicated. Additionally, the previously validated miR-122 binding site (29, 30) in the AldoA 3'-UTR (TarBase) is shown. Numbering refers to the position in the 3'-UTR whereby the first base following the stop codon is counted as position 1. The nucleotides that have been mutated in the wild type 3'-UTRs are indicated in bold. The newly introduced nucleotides contained in the mutated 3'-UTR sequences are indicated in bold and *italics*.

**Table 4A**

Primers used for qPCR analysis of mRNA transcripts

| Name         | Sequence                  |
|--------------|---------------------------|
| mmu-Actb F   | GCTTCTTTGACGCTCCTTCGT     |
| mmu-Actb R   | ACCAGCGCAGCGATATCG        |
| mmu-Alas2 F  | CAGGGCTTTCTGTATCC         |
| mmu-Alas2 R  | TGCTGTTGAGTGCTGCATTA      |
| mmu-AldoA F  | TGCCAGTATGTTACTGAGAAGTGC  |
| mmu-AldoA R  | CATGTTGGGCTTCAGCAA        |
| mmu-BMP2k F  | CCGTCCCTTTCATTTCTCAC      |
| mmu-BMP2k R  | TTGGAGAATGTTCCGTCGTT      |
| mmu-Bmpr1a F | CAGTTTATCTAGCCACATCTCTGA  |
| mmu-Bmpr1a R | GGGAGGCTTCTTACAGAACA      |
| mmu-CRP F    | TCAGCTTCTCGGACTTTTG       |
| mmu-CRP R    | AGGTGTTGAGTGGCTTCTTTG     |
| mmu-Gapdh F  | CCCATTCTCGGCTTGACTGT      |
| mmu-Gapdh R  | GTGGAGATTGTTGCCATCAACGA   |
| mmu-Hamp F   | CCTATCTCCAGCAACAGATG      |
| mmu-Hamp R   | AACAGATACCACAGGAGGGT      |
| mmu-Hba-a1 F | CCTGGAAAGGATGTTTGCTAGCT   |
| mmu-Hba-a1 R | TTTGGGTGAAAGACAACAGTG     |
| mmu-Hfe F    | CACCGTCTGTGCCATCTTCTT     |
| mmu-Hfe R    | ACATAGCCACCCATGGTTCCT     |
| mmu-Himbs F  | CATACTACCTCTGGCTTACTATTGG |
| mmu-Himbs R  | TTTGGGTGAAAGACAACAGCAT    |
| mmu-Hjv F    | CAGCTCCCGGTTTCGT          |
| mmu-Hjv R    | TGGTAGACTTCTGGTCAATGCA    |
| mmu-Gata-1 F | CCCTGAACCTGTCATACCACT     |
| mmu-Gata-1 R | GGGAACACTGGGGTTGAA        |
| mmu-Gata-2 F | GCTTCACCCCTAAGCAGAGA      |
| mmu-Gata-2 R | TGGCACCAAGTTCAGACA        |
| mmu-Smad4 F  | ACACCAACAAAGTAACGATGCC    |
| mmu-Smad4 R  | GCAAAGGTTTCACTTCCCA       |
| mmu-Smad6 F  | GTTGCAACCCACTTC           |
| mmu-Smad6 R  | GGAGGAGACAAGAATA          |
| mmu-Smad7 F  | GCAGGCTGTCCAGATGCTGT      |
| mmu-Smad7 R  | GATCCCAGGCTCCAGAAGA       |
| mmu-Smurf2 F | TTACATGAGCAGGACACTTACA    |
| mmu-Smurf2 R | GCTGCGTTGTCCTTTGTT        |

**Table 4E**

LNA oligos used in this study

| Name            | Sequence        |
|-----------------|-----------------|
| PM_antimiR-122  | CcAttGTcaCaCtCC |
| 2MM_antimiR-122 | CcAttCTcaCaCtGC |

## Supplemental Table 4

List of primers for (A) qPCR analysis of mRNA transcripts, (B) miQPCR analysis to monitor miRNA expression, (C) PCR amplification of selected 3'-UTRs for cloning into the pMIR vector and (D) mutagenesis of the predicted miR-122 binding sites within the 3'-UTR of the genes of interest. (E) Sequences of the PM\_antimiR-122 and 2MM\_antimiR-122 LNA oligonucleotides used in this study. Uppercase: LNA; lowercase: DNA.

**Table 4B**

Primers used for qPCR analysis of miRNAs

| Name              | Sequence                          |
|-------------------|-----------------------------------|
| mmu-miR-122       | TGGAGTGTGACAATGGTGTGTTG           |
| mmu-miR-17        | AAAGTGCTTACAGTGCAGGTAGG           |
| mmu-miR-29b       | GCACCATTTGAAATCAGTGTG             |
| mmu-miR-451       | AAACCGTTACCATTACTGAGTTG           |
| pri-mmu-miR-122 F | CCAAACACCATTGTCACTCCAG            |
| pri-mmu-miR-122 R | CTAGCTGGAGTGTGACAATGGTGTGTTGGAGCT |

**Table 4C**

Primers used for the amplification of 3'-UTR sequences

| Name        | Sequence                         |
|-------------|----------------------------------|
| mmu-AldoA F | GAGAGCTCCGACGCGAGTGAATCTCTC      |
| mmu-AldoA R | GAGTAGCAATAGTGTGTTATTGGCAGTGG    |
| mmu-Gapdh F | GAGAGCTCACATGGCTCCAAGGAGTAA      |
| mmu-Gapdh-A | GAGTAGCGGGTGCAGCGAACTTTATTG      |
| mmu-Hamp F  | GAGAGCTCCAACCTCCCATCTGCATCT      |
| mmu-Hamp R  | GAGTAGCTAAAATCGTCTTTATTCAAGGTCA  |
| mmu-Hfe F   | GAGAGCTCGGAACCATGGTGGCTATGT      |
| mmu-Hfe R   | GAGTAGCCACAGTTGTGTAGCCTTCATGG    |
| mmu-Hjv F   | GAGAGCTCTGTTCTGTGGCTTGTCTCA      |
| mmu-Hjv R   | GAGTAGCGGAGAACAATCGCTTTAATAACAGA |
| pMIR F      | CCAAGAAGGGCGGAAAGA               |
| pMIR R      | TCATCAATGTATCTTATCATGTCTGC       |

**Table 4D**

Primers used to mutagenize the miR-122 seed sequences

| Name         | Sequence                                       |
|--------------|------------------------------------------------|
| miHjv_m3-F   | CACCAACTCAGAAACGGGGATATCCATCCCTTGTAATCTGTATT   |
| miHjv_m3-R   | CCCCTTCTGAGTTGGTCCAGTCTCC                      |
| miHjv_m2-F   | CACCTCCATACACCTGATACACTGGTACAAGCCTA            |
| miHjv_m2-R   | AGGTGTATGGAGAGTGGAAATTTTATT                    |
| miHjv_m1-F   | CCAAAGGAAACAGCGGGTACCAGGAGACAACAGTTTCTCAATCAGA |
| miHjv_m1-R   | CGCTGTTTCTTTGGCACATCTTTG                       |
| miHfe_m2-F   | AAGACTTGGAGGGGTACCCTTGCTCCAGAGTAGGACACA        |
| miHfe_m2-R   | CCCCCTCAAGTCTTTGGCTGAGTT                       |
| miHfe_m1-F   | CTGCTTCTTGGAAAGCTTCTATGTTTCTTCTTGTGCACCTAGA    |
| miHfe_m1-R   | GCTTCCAAGAAGCAGCCTAAGAATC                      |
| miHamp_m1-F  | TCAACCCCAATTTATTGGTGCCTCCCC                    |
| miHamp_m1-R  | AATAAATAATGGGGTTGAGGGGCTGCAG                   |
| miAldoA_m1-F | TGAACTAAGGCTGCAGCATCAACTGGAGGCCCTGC            |
| miAldoA_m1-R | CCTTAGTTCAGCTCTGG                              |

Supplemental Table 5A: Laboratory findings in patients with C282Y mutations and controls .

| No. | Age | HFE    | Transferrin<br>(2.0-3.6 g/l) | Transf. Sat.<br>(18-45%) | Ferritin<br>(30-300 µg/l) | AST<br>(<35 U/l) | ALT<br>(<35 U/l) | GGT<br>(<40 U/l) | AP<br>(55-105 U/l) | CHE<br>(4.26-11.25 kU/l) | BIL<br>(<1.0 mg/dl) |
|-----|-----|--------|------------------------------|--------------------------|---------------------------|------------------|------------------|------------------|--------------------|--------------------------|---------------------|
| 1   | 70  | C282Y  | n.d.                         | n.d.                     | n.d.                      | n.d.             | n.d.             | n.d.             | n.d.               | n.d.                     | n.d.                |
| 2   | 58  | C282Y  | n.d.                         | n.d.                     | 2000                      | n.d.             | n.d.             | n.d.             | n.d.               | n.d.                     | n.d.                |
| 3   | 34  | C282Y  | 1.4                          | 100%                     | 2932                      | 46               | 94               | 64               | 49                 | 7.2                      | 2.8                 |
| 4   | 48  | C282Y  | n.d.                         | n.d.                     | n.d.                      | n.d.             | n.d.             | n.d.             | n.d.               | n.d.                     | n.d.                |
| 5   | 54  | C282Y  | n.d.                         | n.d.                     | 1500                      | n.d.             | n.d.             | n.d.             | n.d.               | n.d.                     | n.d.                |
| 6   | 48  | C282Y  | n.d.                         | 84%                      | 1200                      | n.d.             | n.d.             | n.d.             | n.d.               | n.d.                     | n.d.                |
| 7   | 64  | Contr. | n.d.                         | n.d.                     | n.d.                      | 27               | 19               | 90               | 29                 | n.d.                     | 0.5                 |
| 8   | 22  | Contr. | 1.7                          | n.d.                     | 63                        | 19               | 15               | 43               | 9                  | 8.4                      | 0.9                 |
| 9   | 52  | Contr. | 2.4                          | 48%                      | 100                       | 74               | 58               | 139              | 100                | 9.4                      | 0.8                 |
| 10  | 36  | Contr. | 2.6                          | 23%                      | 128                       | 32               | 67               | 89               | 177                | 11.6                     | 0.4                 |

Supplemental Table 5B: Histological evaluation of liver biopsies.

| No.1 | Siderosis grade | Inflammation | Fatty change | HFE stage | Fibrosis (SSS) | Fibrotic area (%) |
|------|-----------------|--------------|--------------|-----------|----------------|-------------------|
| 1    | 2               | 1            | 2            | 2         | 8              | 5                 |
| 2    | 4               | 1            | 1            | 2         | 4              | 5                 |
| 3    | 4               | 0            | 0            | 2         | 6              | 5                 |
| 4    | 4               | 0            | 0            | 2         | 4              | <5                |
| 5    | 2               | 1            | 3            | 2         | 7              | 5                 |
| 6    | 3               | 1            | 2            | 2         | 2              | 5                 |
| 7    | 0               | 1            | 1            | n.a.      | 1              | 5                 |
| 8    | 0               | 0            | 0            | n.a.      | 2              | <5                |
| 9    | 0               | 0            | 0            | n.a.      | 1              | <5                |
| 10   | 0               | 0            | 0            | n.a.      | 2              | <5                |

**(5A): Abbreviations:** n.d. = no data available, AST: aspartate aminotransferase; ALT: alanin aminotransferase; GGT:  $\gamma$ -glutamyl transpeptidase; AP: alkaline phosphatase; CHE: choline esterase; BIL: total bilirubin. Contr.: Control patients without a C282Y mutation in the Hfe gene. Normal limits are indicated in brackets. C282Y homozygosity was established by sequencing (see supplemental material and methods)

**(5B): Abbreviations** n.a. = not applicable; SSS = semiquantitative severity score according Chevallier et al.

## **Supplemental material and methods**

### **Materials and methods**

#### **Detailed protocol for the preparation of murine primary hepatocytes**

Primary mouse hepatocytes have been isolated according to a modified standard procedure published by Klingmüller *et al* (2006). If not stated otherwise chemicals were purchased from Sigma Aldrich. Primary mouse hepatocytes were isolated from eight to twelve weeks old male C57BL/6N mice (Charles River). The mice have been anesthetized by intra peritoneal injection of 5 mg per 100 mg body weight ketamine hydrochloride 10 % (w/v) (Bayer) and 1 mg per 100 mg body weight of xylazine hydrochloride 2 % (w/v) (Pfizer). The liver perfusion was performed by an anterograde fashion via the portal vein with EGTA-containing buffer (0.6 % (w/v) glucose, 105 mM NaCl, 2.4 mM KCl, 1.2 mM KH<sub>2</sub>PO<sub>4</sub>, 26 mM Hepes, 490 µM L-glutamine, 512 µM EGTA, 15 % (v/v) amino acid solution, pH 8.3) and collagenase-containing buffer (0.6 % (w/v) glucose, 105 mM NaCl, 2.3 mM KCl, 1.2 mM KH<sub>2</sub>PO<sub>4</sub>, 25 mM Hepes, 490 µM L-glutamine, 5.3 mM CaCl<sub>2</sub>, 12 % (v/v) amino acid solution, 365 µg/ml collagenase type 1-A, pH 8.3). The amino acid solution constituted of 270 mg/l L-alanine, 140 mg/l L-aspartic acid, 400 mg/l L-asparagine, 270 mg/l L-citrulline, 140 mg/l L-cysteine hydrochloride monohydrate, 1 g/l L-histidine monohydrochloride monohydrate, 1 g/l L-glutamic acid, 1 g/l L-glycine, 400 mg/l L-isoleucine, 800 mg/l L-leucine, 1.3 g/l L-lysine monohydrochloride, 550 mg/l L-methionine, 650 mg/l L-ornithine monohydrochloride, 550 mg/l L-phenylalanine, 550 mg/l L-proline, 650 mg/l L-serine, 1.35 g/l L-threonine, 650 mg/l L-tryptophane, 550 mg/l L-tyrosine, and 800 mg/l L-valine, pH 7.6. The perfused liver was subsequently withdrawn and transferred into washing buffer (0.6 % (w/v) glucose, 105 mM NaCl, 2.4 mM KCl, 1.2 mM KH<sub>2</sub>PO<sub>4</sub>, 26 mM Hepes, 1 mM CaCl<sub>2</sub>, 0.4 mM MgSO<sub>4</sub>, 0.2 % (w/v) BSA, 15 % (v/v) amino acid solution, pH 7.6). Hepatocytes were collected by disrupting the liver capsule and filtering the suspension using a 100 µm cell strainer (BD biosciences). Cells were then washed two times

by centrifugation at 50 x g for 2 min. Cell yield and vitality were determined by trypan blue staining, preparations with a vitality > 70 % were used for our studies. For experiments 900000 cells were seeded in 1 ml full medium (phenol red-free Williams E medium (Biochrom) supplemented with 10 % (v/v) FBS (Invitrogen), 1  $\mu$ M dexamethasone, 10  $\mu$ g/ml insulin, 2 mM L-glutamine, and 1 % (v/v) penicillin/streptomycin 100x (both Invitrogen)) using collagen I-coated 6well/dishes (BD Biosciences). Primary hepatocytes were cultured at 37 °C, 5 % CO<sub>2</sub> and 95 % rh. Unattached hepatocytes were removed after 4 h of adhesion by washing with PBS (PAN Biotech), the attached hepatocytes were subsequently cultured in cultivation medium (phenol red-free Williams E medium supplemented with 1  $\mu$ M dexamethasone, 2 mM L-glutamine).

### **Western blot analysis**

Protein isolation and western blotting were performed according to standard protocols. In brief, flash-frozen tissues were homogenized in RIPA buffer complemented with 4 mg/mL PefablocSC, 0.1 mg/mL aprotinin, 20  $\mu$ g/mL leupeptin, 40  $\mu$ g/mL E64, 4  $\mu$ g/ml pepstatin (all from Roche Diagnostic), and soluble proteins were recovered by centrifugation. For immunoblotting, equivalent amounts of protein extract (40  $\mu$ g) were resolved on a 10% SDS-gel and transferred onto a PVDF membrane. Membranes were incubated with primary antibodies [pStat3, (Cat 9138, diluted 1:500, cell signaling); Stat3(Cat 9132, diluted 1:500, Cell signaling); pSmad1/5/8, (Cat 9511, diluted 1:500, Cell signaling);  $\beta$ Actin, (Cat A5316, diluted 1:10000, Sigma)] and with a secondary IgG-HRP-conjugate (diluted 1:10000; Sigma). Blots were developed using an ECL (Amersham) chemiluminescence detection system.

### **Patient characteristics and liver biopsy evaluation:**

Pseudonymized male human tissue samples were provided by the Tissue bank of the National Center for Tumor Diseases Heidelberg after approval by the ethics committee. Patient characteristics are depicted in

(Supplemental. Table 5A and 5B) For the evaluation of liver biopsies, serial 3  $\mu\text{m}$  sections were stained with hematoxylin-eosin (H&E), periodic acid Schiff after diastase digestion, Perl's Prussian blue, and modified Gomori's stain. Inflammatory changes were recorded semiquantitatively: 0 = none; 1 = mild: few single cell necrosis, mild portal infiltrate, no interface hepatitis; 2 = moderate: some single cell necrosis, moderate portal infiltrate, or interface hepatitis; 3 = group necrosis. Fatty change was graded using a 4-tiered system: 0 = no fat; 1 = <25% fatty change (mild); 2 = 25-50% fatty change (moderate); 3 = >50% (fatty liver). Grading of hepatocellular siderosis and staging of genetic hemochromatosis was performed as reported previously (Scheuer PJ, Williams R, Muir AR (1962) Hepatic pathology in relatives of patients with haemochromatosis. *The Journal Pathol Bacteriol* 84: 53–64). In brief, hepatocellular siderosis was evaluated as follows: 0 = none; 1 = mild siderosis, hardly visible at magnification 250-fold; 2 = moderate siderosis, visible at magnification 100-fold; 3 = severe siderosis, visible at magnification 25-fold with porto-central gradient; 4 = iron excess. Staging of genetic hemochromatosis: 1 = no fibrosis; 2 = fibrosis; 3 = cirrhosis. For semiquantitative assessment of liver fibrosis the semiquantitative severity score (SSS) according to Chevalier et al. was used (Chevallier M, Guerret S, Chossegros P et al. (1994) A histological semiquantitative scoring system for evaluation of hepatic fibrosis in needle liver biopsy specimens: comparison with morphometric studies. *Hepatology* 20: 349–355).

### **cDNA synthesis by miPCR**

miQPCR is a novel approach for expression profiling of microRNA by qPCR. In principle, the 3'-ends of single-stranded RNAs are extended uniformly with a specific RNA/DNA linker (named miLINKER). This adapter is used as an anchor to prime cDNA synthesis during reverse transcription and for detecting the selected amplicon during the qPCR. For each sample 50 ng of total RNA were ligated to 5  $\mu\text{M}$  of miLINKER using the T4 RNA ligase (NEB). Ligated samples were reverse transcribed using Superscript II (Invitrogen) following the supplier's instructions. miRNA-specific qPCR requires 100 pg of cDNA, 2.5  $\mu\text{M}$  of universal primer complementary to the linker and 2.5  $\mu\text{M}$  of miRNA specific primer. qPCR reactions are carried out on an AB7500 machine, whereas amplicons are detected using SIBR green I (AB).

### **PCR design and sequencing**

For PCR-amplification of the human Hfe gene, the following primers were used (Hfe-Ex2-F: 5'-GTT TGA AGC TTT GGG CTA CG-3, and Hfe-Ex2-R: 5'- ATG TGA TCC CAC CCT TTC AG-3' for exon 2



and Hfe-Ex4-F: 5'- TCG AAC CTA AAG ACG TAT TGC CC-3', and Hfe-Ex4-R: 5'- TTC TCA GCT CCT GGC TCT CAT C-3'). The temperature profile was 94°C for 5 min followed by 32 cycles of 94°C for 30 s. 60°C for 30 s and 72°C for 30 s. A final extension step of 72°C for 5 min was added. PCR-amplification was carried out using *Pfu* DNA Polymerase (Fermentas, St. Leon-Rot, Germany) according to the manufacturer's instructions. PCR fragments were directly sequenced bidirectionally on an ABI Prism® 377-18 DNA Sequencer (Applied Biosystems, Foster City, CA, USA) using the BigDye® Termination v 1.1 Cycle Sequencing Kit (Applied Biosystems) according to the manufacturer's instructions.
